# Supplementary material for: Impact of the growth stages and seasons of harvesting cassava (Manihot esculenta Crantz) leaves on heavy trace elements and antioxidant activity
Source: Research Square preprint supplement (doi:10.21203/rs.3.rs-7150678/v1), 2025-08-27
Supplement: Supplementary file 1 [file 43e00f71003d08aba54d92aa.docx]

| Varieties | Different harvests | Phytic Acids  (mg DioE/ 100gdw) | Saponnins  (mg PAE/ 100gdw) |
| --- | --- | --- | --- |
| TMS92/0326 | 6 Months After Planting | 1.10 ± 0.00d | 0.78 ± 0.00c |
| TMS96/1414 | 0.89 ± 0.00d | 0.59 ± 0.01c |
| IRAD4115 | 1.40 ± 0.05b | 0.97 ± 0.01c |
| EN | 1.82 ± 0.00a | 2.08 ± 0.12a |
| AD | 1.15 ± 0.08c | 1.41 ± 0.08b |
| TMS92/0326 | 9 Months After Planting | 3.83 ± 0.18a | 1.28 ± 0.05d |
| TMS96/1414 | 3.69 ± 0.30b | 2.30 ± 0.19a |
| IRAD4115 | 2.01 ± 0.08c | 2.08 ± 0.02b |
| EN | 1.56 ± 0.06d | 1.70 ± 0.06c |
| AD | 3.54 ± 0.17b | 1.60 ± 0.01c |
| TMS92/0326 | 12 Months After Planting | 2.91 ± 0.06b | 2.95 ± 0.07b |
| TMS96/1414 | 2.69 ± 0.04c | 2.02 ± 0.10d |
| IRAD4115 | 3.56 ± 0.13a | 3.17 ± 0.06a |
| EN | 3.41 ± 0.22a | 2.76 ± 0.03b |
| AD | 2.59 ± 0.16c | 2.24 ± 0.05c |
| TMS92/0326 | 15 Months After Planting | 3.70 ± 0.04c | 3.09 ± 0.03b |
| TMS96/1414 | 5.40 ± 0.06b | 2.14 ± 0.05c |
| IRAD4115 | 8.31 ± 0.45a | 5.74 ± 0.04a |
| EN | 3.56 ± 0.08c | 1.37 ± 0.01d |
| AD | 3.39 ± 0.05cd | 2.01 ± 0.02c |

**Table 1. Phytic acid and saponnin contents in CL during growth stage of harvests**

Values are means ± standard deviation of four replicates (n=4). In the same column. Values followed by different superscript letters are significantly different (p<0.05) for the same month. Cd : cadmium, Ni : nickel, As : arsenic, Co : cobalt, Pb : lead, Cr : chromium, Al : aluminum, DioE : diosgenin equivalent, PAE : phytic acid equivalent.

| Varieties | | | | | |
| --- | --- | --- | --- | --- | --- |
| Metals | TMS92/0326 | TMS96/1414 | IRAD4115 | EN | AD |
| Cd | 3.50 ± 0.06e | 8.69 ± 0.58c | 1 9.37 ± 0.15a | 1 5.27 ± 0.44b | 6.67 ± 0.31d |
| Ni | 0.5 ± 0.07a | 0.000 ± 0.000b | 0.000 ± 0.000b | 0.000 ± 0.000b | 0.000 ± 0.000b |
| As | 14 9.15 ± 0.19a | 9 3.32 ± 2.21c | 11 5.37 ± 2.10b | 2 5.94 ± 0.29d | - |
| Co | - | - | - | - | - |
| Pb | - | - | - | - | - |
| Cr | 3.42 ± 0.19a | 0.000 ± 0.000b | 0.000 ± 0.000b | 0.000 ± 0.000b | 0.000 ± 0.000b |
| Al | 10 9.63 ± 0.57d | 6 8.90 ± 0.82e | 133 2.22 ± 2.10b | 46 9.55 ± 5.48a | 11 3.35 ± 1.90c |

**Table 2. Effects of variety on contents of heavy metals in CL collected at 6 months after planting in the onset of dry season (µg/gdw)**

Values are means ± standard deviation of three replicates (n=4). In the same line. Values followed by different superscript letters are significantly different (p<0.05). Cd : cadmium. Ni : nickel. As : arsenic. Co : cobalt. Pb : lead. Cr : chromium. Al : aluminum. -: Concentration of the tested heavy metal was below the method detection limit.

**Table 3. Effects of variety on contents of heavy metals in CL collected at 9 months after planting in the main dry season (µg/gdw)**

| Varieties | | | | | |
| --- | --- | --- | --- | --- | --- |
| Metals | TMS92/0326 | TMS96/1414 | IRAD4115 | EN | AD |
| Cd | 2 0.04 ± 0.06e | 4.09 ± 0.53d | 2 7.71 ± 0.87b | 4 1.15 ± 0.67a | 1 7.46 ± 0.55c |
| Ni | 0.5 ± 0.02a | 0.000 ± 0.000b | 0.000 ± 0.000b | 0.000 ± 0.000b | 0.000 ± 0.000b |
| As | 3.66 ± 0.02d | 1.25 ± 0.07e | 7 1.76 ± 1.91a | 6 6.68 ± 2.30b | 1 8.82 ± 1.05c |
| Co | - | - | - | - | - |
| Pb | - | - | - | - | - |
| Cr | 0.000 ± 0.000c | 0.000 ± 0.000c | 3.42 ± 0.19b | 5.02 ± 0.28a | 0.000 ± 0.000c |
| Al | 118 6.50 ± 5.10a | 39 5.82 ± 1 .45c | 54 8.70 ± 1.42b | 2 46. 41 ± 0.56e | 39 4.08 ± 1.05d |

Values are means ± standard deviation of four replicates (n=4). In the same line. Values followed by different superscript letters are significantly different (p<0.05). Cd : cadmium. Ni : nickel. As : arsenic. Co : cobalt. Pb : lead. Cr : chromium. Al : aluminum. -: Concentration of the tested heavy metal was below the method detection limit.

**Table 4. Effects of variety on contents of heavy metals in CL collected at 12 months after planting in the onset of rainy season (µg/gdw)**

| Varieties | | | | | |
| --- | --- | --- | --- | --- | --- |
| Metals | TMS92/0326 | TMS96/1414 | IRAD4115 | EN | AD |
| Cd | 5.97 ± 0.11d | 1 2.37 ± 0.98b | 1 9.69 ± 0.64a | 1 1.75 ± 0.28c | 1 3.65 ± 0.55b |
| Ni | 0.67 ± 0.11a | - | - | - | - |
| As | 32. 06 ± 0.40b | 6 9.52 ± 0.73a | 13. 68 ± 7.42d | 11.12 ± 0.21e | 17. 97 ± 1.05c |
| Co | 9.72 ± 0.43a | 0.000 ± 0.000b | 0.000 ± 0.000b | 0.000 ± 0.000b | 0.000 ± 0.000b |
| Pb | - | - | - | - | - |
| Cr | - | - | - | - | - |
| Al | 59 0.70 ± 0.84a | 2 6.88 ± 0.76d | 4 5.66 ± 0.49c | 14 2.15 ± 0.11b | 1 1.60 ± 0.33e |

Values are means ± standard deviation of four replicates (n=4). In the same line. Values followed by different superscript letters are significantly different (p<0.05). Cd : cadmium. Ni : nickel. As : arsenic. Co : cobalt. Pb : lead. Cr : chromium. Al : aluminum. -: Concentration of the tested heavy metal was below the method detection limit.

**Table 5. Effects of variety on contents of heavy metals in CL harvested at 12 months after planting in the main rainy season (µg/gdw)**

| Varieties | | | | | |
| --- | --- | --- | --- | --- | --- |
| Metals | TMS92/0326 | TMS96/1414 | IRAD4115 | EN | AD |
| Cd | 1 6.53 ± 0.25a | 0.85 ± 0.32b | - | - | - |
| Ni | 0.000 ± 0.000b | 0.000 ± 0.000b | 0.000 ± 0.000b | 0.10 ± 0.00a | 0.17 ± 0.02a |
| As | 16. 77 ± 0.11e | 22. 68 ± 0.65d | 45.85 ± 3.04a | 42. 64 ± 2.20b | 41.98 ± 1.20c |
| Co | 0.000 ± 0.000b | 0.000 ± 0.000b | 3.14 ± 0.18a | 0.000 ± 0.000b | 0.000 ± 0.000b |
| Pb | - | - | - | - | - |
| Cr | - | - | - | - | - |
| Al | 26 3.53 ± 1.05a | 1 2.63 ± 0.52d | 25 5.33 ± 0.53b | 8 9.14 ± 1.64c | 1 0.40 ± 0.87e |

Values are means ± standard deviation of four replicates (n=4). In the same line. Values followed by different superscript letters are significantly different (p<0.05). Cd : cadmium. Ni : nickel. As : arsenic. Co : cobalt. Pb : lead. Cr : chromium. Al : aluminum. -: Concentration of the tested heavy metal was below the method detection limit
