# Supplementary material for: Impact of the growth stages and seasons of harvesting cassava (Manihot esculenta Crantz) leaves on heavy trace elements and antioxidant activity
Source: Research Square preprint supplement (doi:10.21203/rs.3.rs-7150678/v1), 2025-08-27
Supplement: Supplementary file 2 [file 8ba7ac428cef9d7274cd39ad.docx]

MAP : Month after planting. 6, 9, 12 and 15 are months at harvesting time. Bars followed by different lowercase letters in different variety for the same month are significantly different (p < 0.05).

**Fig 1S**. Effects of the harvest and variety on anthocyanins content in cassava (*M. esculenta*) leaves

MAP : Month after planting. 6, 9, 12 and 15 are months at harvesting time. Bars followed by different lowercase letters in different variety for the same month are significantly different (p < 0.05).

**Fig 2S.** Nitric Oxide Radical Scavenging Activity affected by age harvest and variety in Cassava (*M. esculenta*) leaves

MAP : Month after planting. 6, 9, 12 and 15 are months at harvesting time. Bars followed by different lowercase letters in different variety for the same month are significantly different (p < 0.05).

**Fig 3S**. N.N-Dimethyl-p-PhenylenDiamine Radical Scavenging Activity affected by harvest and variety in Cassava (*M. esculenta*) leaves
